# Supplementary material for: TSG101 associates with PARP1 and is essential for PARylation and DNA damage‐induced NF‐κB activation
Source: PubMed Central journal article supplement (PMC9627669; doi:10.15252/embj.2021110372), 2022-09-20
Supplement: EMBJ-41-e110372-s010.pdf [file EMBJ-41-e110372-s010.pdf]

## Expanded View Figures

### Figure EV1. Genome-wide siRNA screening and hit selection.

- A HEK-Luc(tGFP) NF- $\kappa$ B reporter cells were treated with the indicated conditions (50  $\mu$ M etoposide, 20 Gy irradiation, or 10 ng/ml TNF $\alpha$ ). As the NF- $\kappa$ B-driven expression and translation of turbo GFP require more time than the initial activation of the NF- $\kappa$ B pathway, the treatment conditions were alternatively prolonged to 4.5 h. Whole-cell extracts were obtained and immunoblotted with the indicated antibodies.
- B Detailed layout of the genome-wide siRNA screening, carried out using a one-plate-to-one target approach. The indicated controls were added to the siRNA library. As another control, cells were treated with the vehicle DMSO (Column 24). The heatmap displays the Z-scores of tested candidates and controls of a representative plate taken from the siRNA library screen.
- C Spearman's rank correlation coefficient test of representative screening plate replicates demonstrated high assay reproducibility. Same screening plates and layouts were tested, and results were compared with each other (R1 vs R2).
- D TSG101 cluster was visualized using STRING database (Szklarczyk *et al*, 2019). Arrows or lines between candidate hits represent protein-protein interactions observed in previous publications.
- E Representative high-confidence DNA damage-selective hits are shown for etoposide (left panel) and TNF $\alpha$  (right panel) screens. The conditions were compared with an ordinary one-way ANOVA (ns,  $P > 0.05$ ; \*\*\*\* $P < 0.0001$ ). Results were obtained from three biologically independent experiments. Error bars represent mean  $\pm$  SD.

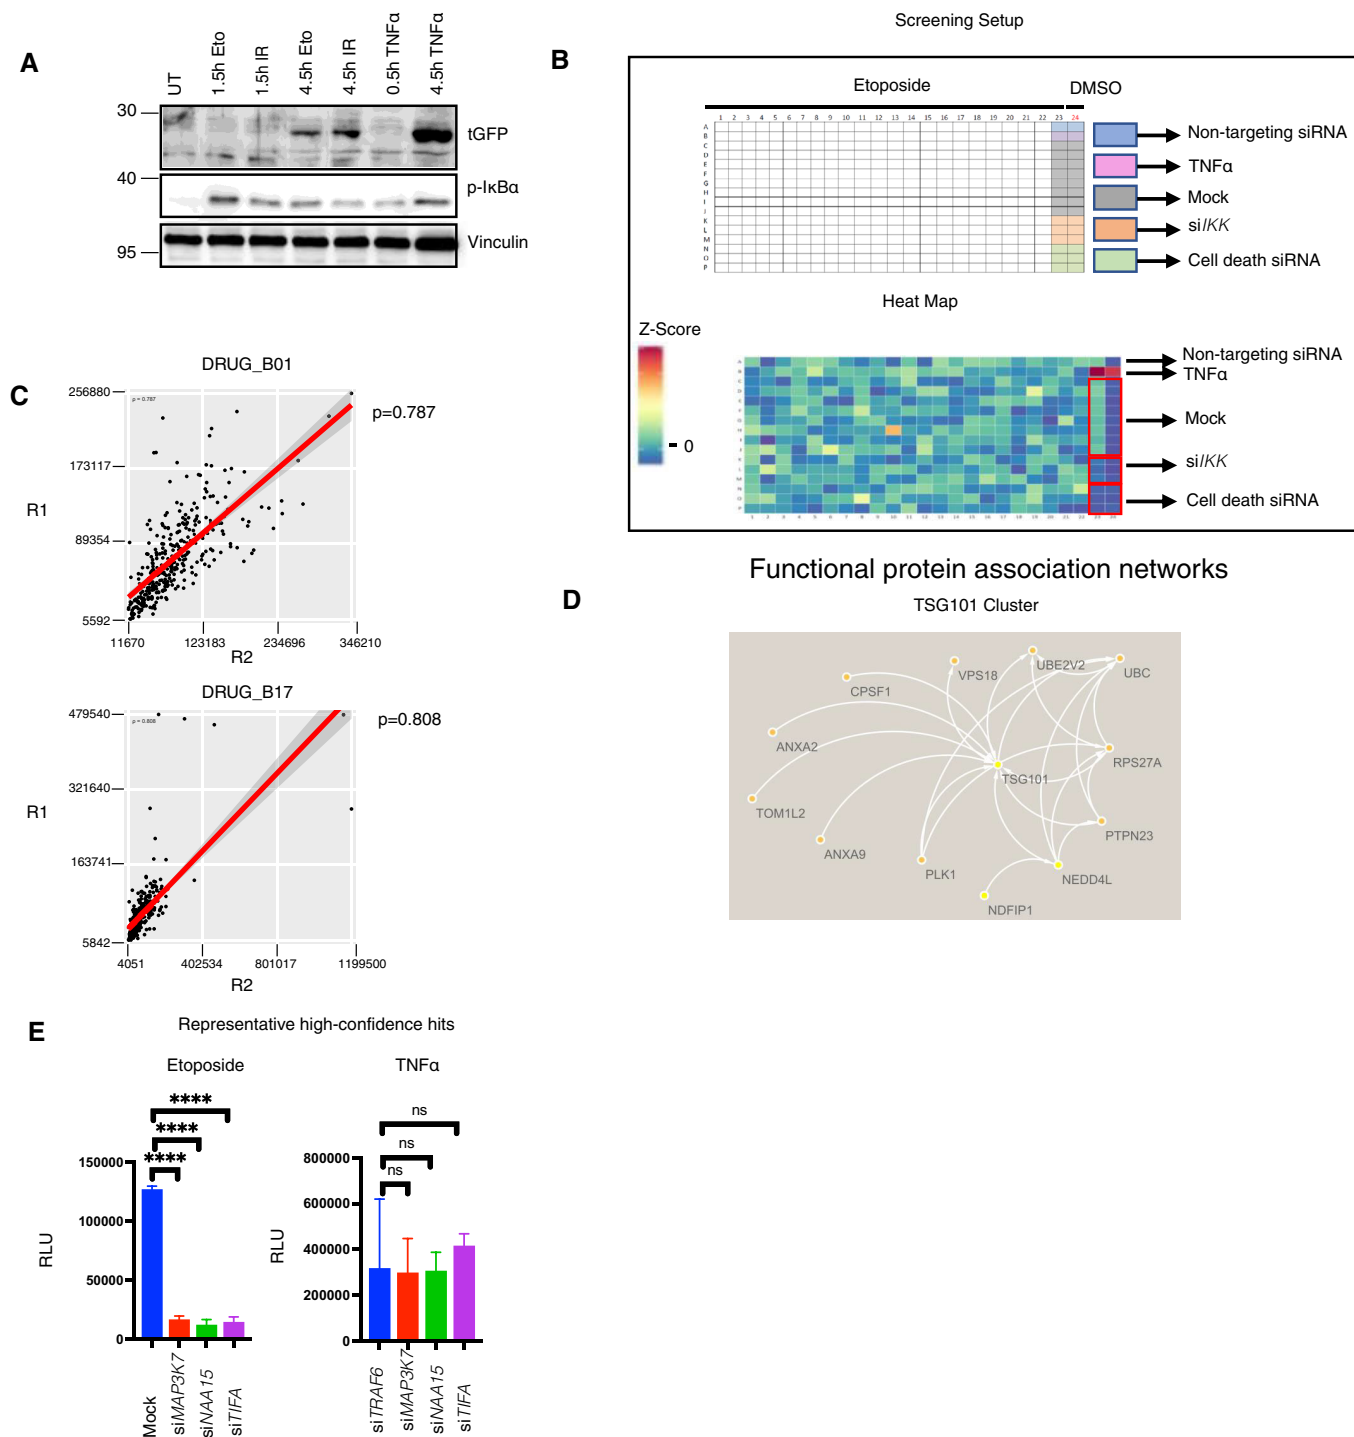

Figure EV1.

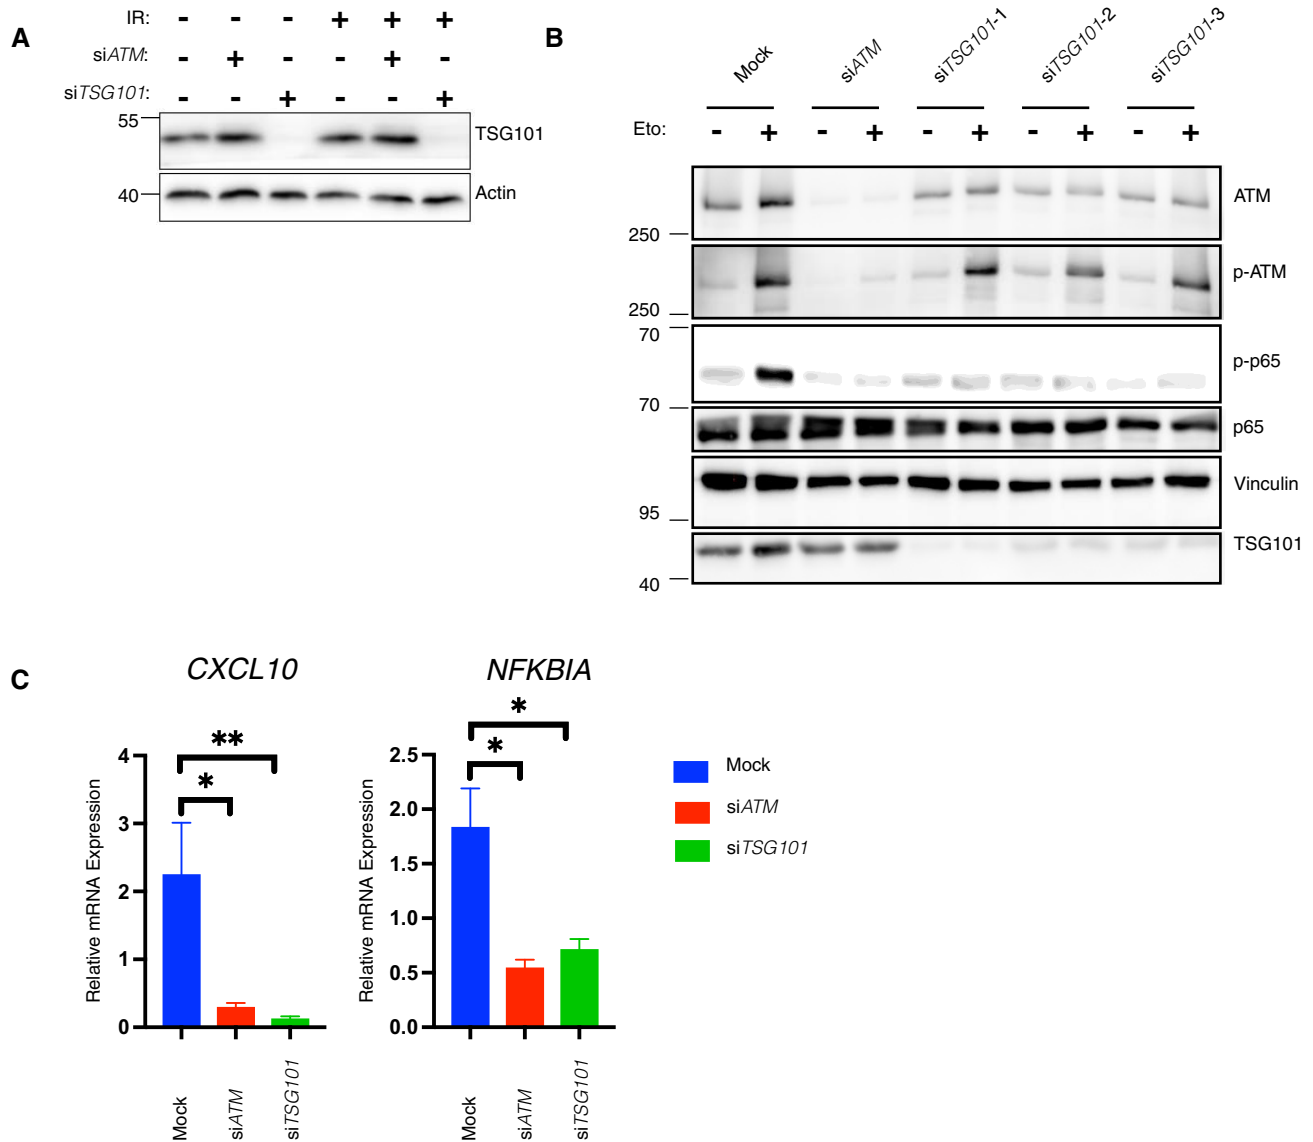

**Figure EV2. TSG101 and ATM are equivalently essential for NF- $\kappa$ B activation by DNA damage.**

A HEK-Luc(tGFP) NF- $\kappa$ B reporter cells were transfected with the same transfection mixtures as used in Fig 2A. Whole-cell extracts were immunoblotted with antibodies against the indicated proteins. Actin was used as a loading control.

B U2-OS cells were transfected with nontargeting (mock) or *ATM*-directed siRNAs or three different *TSG101*-targeting siRNAs. The indicated cells were treated with etoposide (50  $\mu$ M, 90 min. Before analysis). Whole-cell extracts were immunoblotted with the indicated antibodies.

C U2-OS cells were transfected with the indicated siRNAs. The NF- $\kappa$ B pathway was activated by etoposide treatment (50  $\mu$ M, 90 min before analysis). Expression of indicated genes was analyzed using qRT-PCR. The mRNA expression of these genes was normalized to the expression of three housekeeping genes, *ACTA1*, *RPL13A*, and *TBP2*. The gene expression for the indicated conditions is relative to the nontargeting siRNA-transfected vehicle (DMSO)-treated cells. The result is representative of three biologically independent experiments. The conditions were compared with an ordinary one-way ANOVA (\* $P < 0.05$ ; \*\* $P < 0.01$ ). Error bars represent mean  $\pm$  SEM.

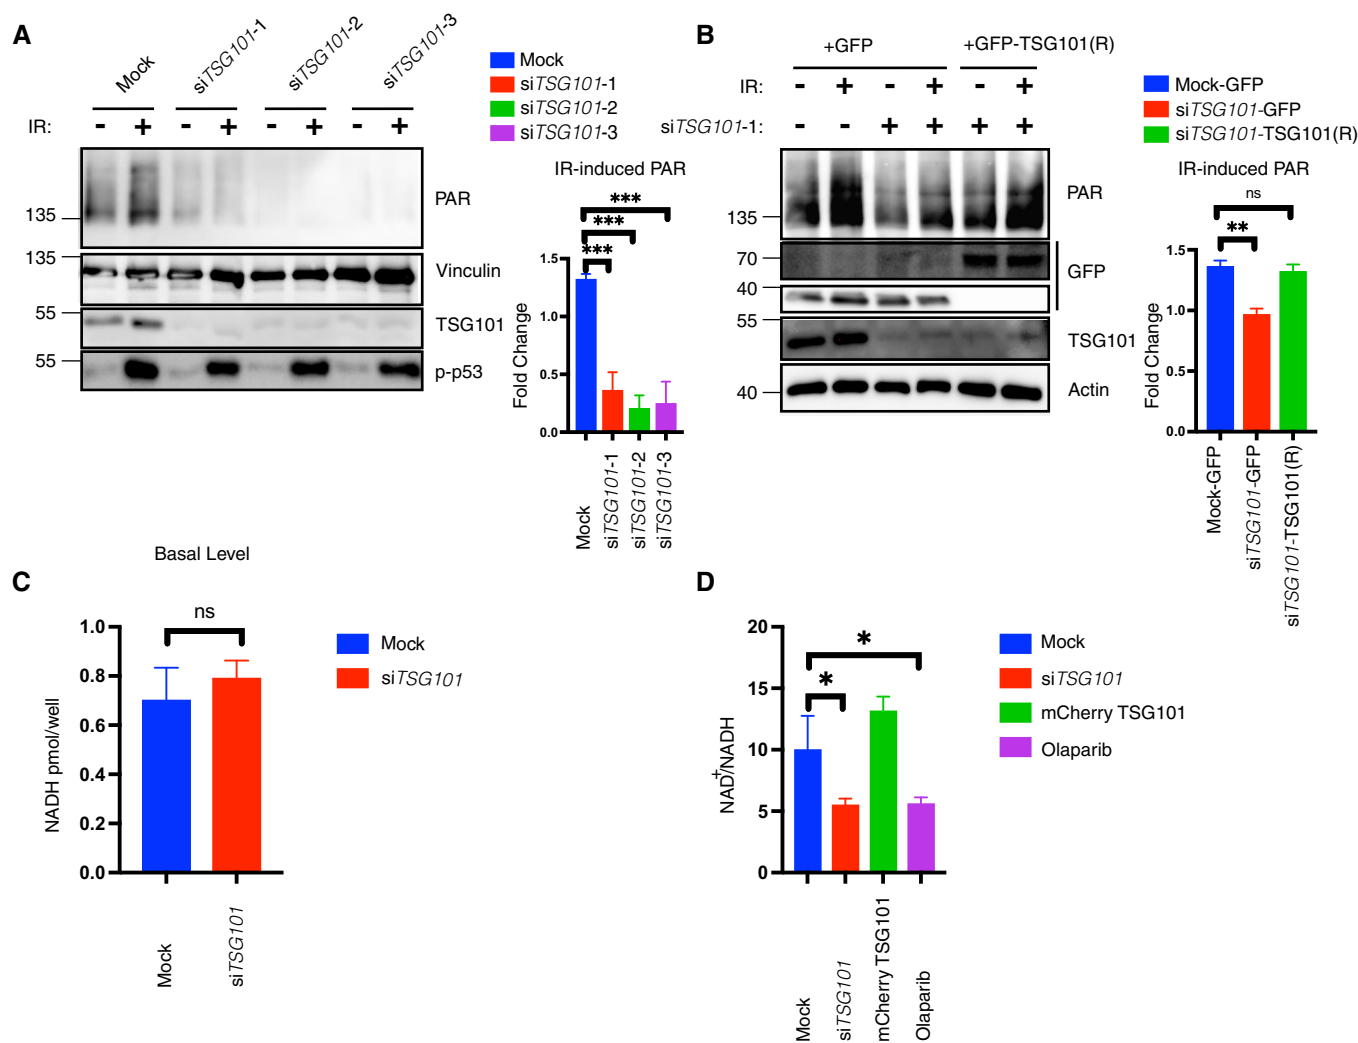

**Figure EV3. TSG101 is essential for PARylation.**

- A U2-OS cells were transfected with nontargeting (mock) or three different *TSG101*-targeting siRNAs. Cells were irradiated (20 Gy) 10 min before analysis. Nuclear extracts were immunoblotted with the indicated reagents and antibodies. Right panel, densitometric measurements of irradiation-induced fold changes in PARylation were obtained from three independent experiments and conditions were compared with an ordinary one-way ANOVA ( $***P < 0.001$ ). Error bars represent mean  $\pm$  SD.
- B A rescue experiment was performed using a siRNA-resistant GFP-TSG101(R) expression vector. Two base substitutions were introduced into the codons for amino acids 61 and 62 of TSG101. U2-OS cells were transfected with either GFP alone or GFP-TSG101 (R) vector. Cells were then transfected with nontargeting or *TSG101*-targeting siRNAs as indicated and were irradiated (20 Gy) 10 min before analysis. Nuclear extracts were immunoblotted with the indicated reagents and antibodies. Densitometric measurements of irradiation-induced fold changes in PARylation (right panel) were obtained from three independent experiments. Conditions were compared with an ordinary one-way ANOVA (ns,  $P > 0.05$ ;  $**P < 0.01$ ). Error bars represent mean  $\pm$  SD.
- C U2-OS cells were transfected with nontargeting or *TSG101*-targeting siRNAs. NADH measurements were performed 72 h after the siRNA transfection. Conditions were compared with Student's *t*-test (Welch Correction) (ns,  $P > 0.05$ ). Error bars represent mean  $\pm$  SD. Results were obtained from three biologically independent experiments.
- D U2-OS cells were transfected with nontargeting (Mock) or *TSG101*-directed siRNAs, with mCherry-*TSG101*, or treated with olaparib (10  $\mu$ M, 16 h before irradiation), as indicated. Cells were irradiated (20 Gy) 10 min before analysis and NAD<sup>+</sup>/NADH levels were determined. The result is representative of four independent experiments. The conditions were compared with an ordinary one-way ANOVA ( $*P < 0.05$ ). Error bars represent mean  $\pm$  SD.

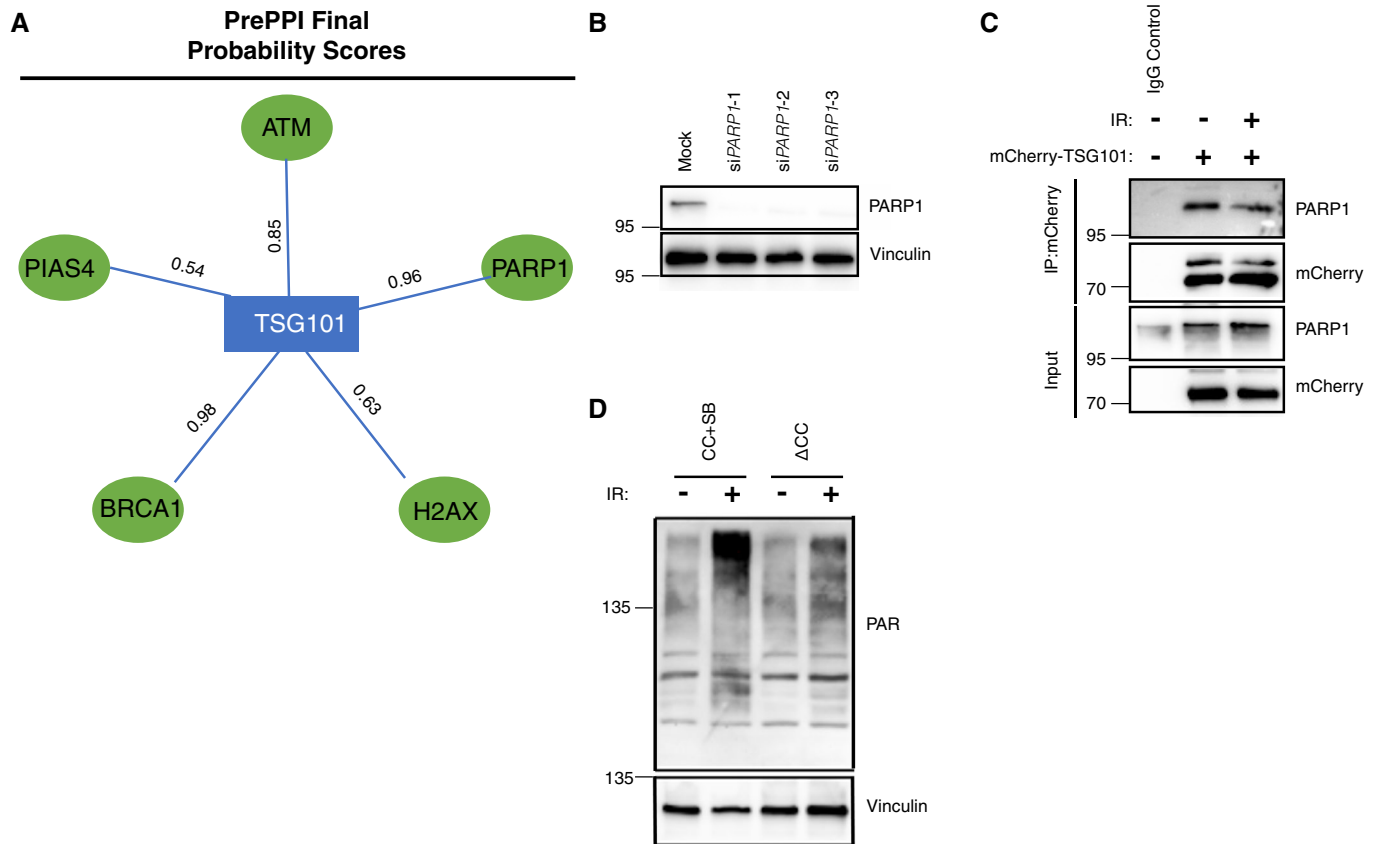

**Figure EV4. TSG101 interacts with and enzymatically activates PARP1.**

A Final protein–protein interaction probability scores for the indicated interactions were obtained from the PrePPI database (Zhang *et al*, 2013).  
 B Validation of PARP1 knockdown in A. Different PARP1 siRNAs were used in each independent PLA experiment summarized in Fig 4B. The representative image in Fig 4A was obtained using siPARP1(3).  
 C U2-OS cells were transfected with the full-length mCherry-tagged TSG101 plasmid and DNA damage was induced by irradiation (20 Gy, 45 min before analysis), as indicated. Immunoprecipitation of mCherry was performed using whole-cell extracts. The result is representative of three biologically independent experiments.  
 D TSG101 deletion constructs CC+SB and ΔCC were expressed in U2-OS cells. Untreated or irradiated cells were harvested (90 min after 20 Gy exposure) and analyzed by Western blotting for PAR levels using the Pan ADPr reagent. Vinculin was detected as a loading control.

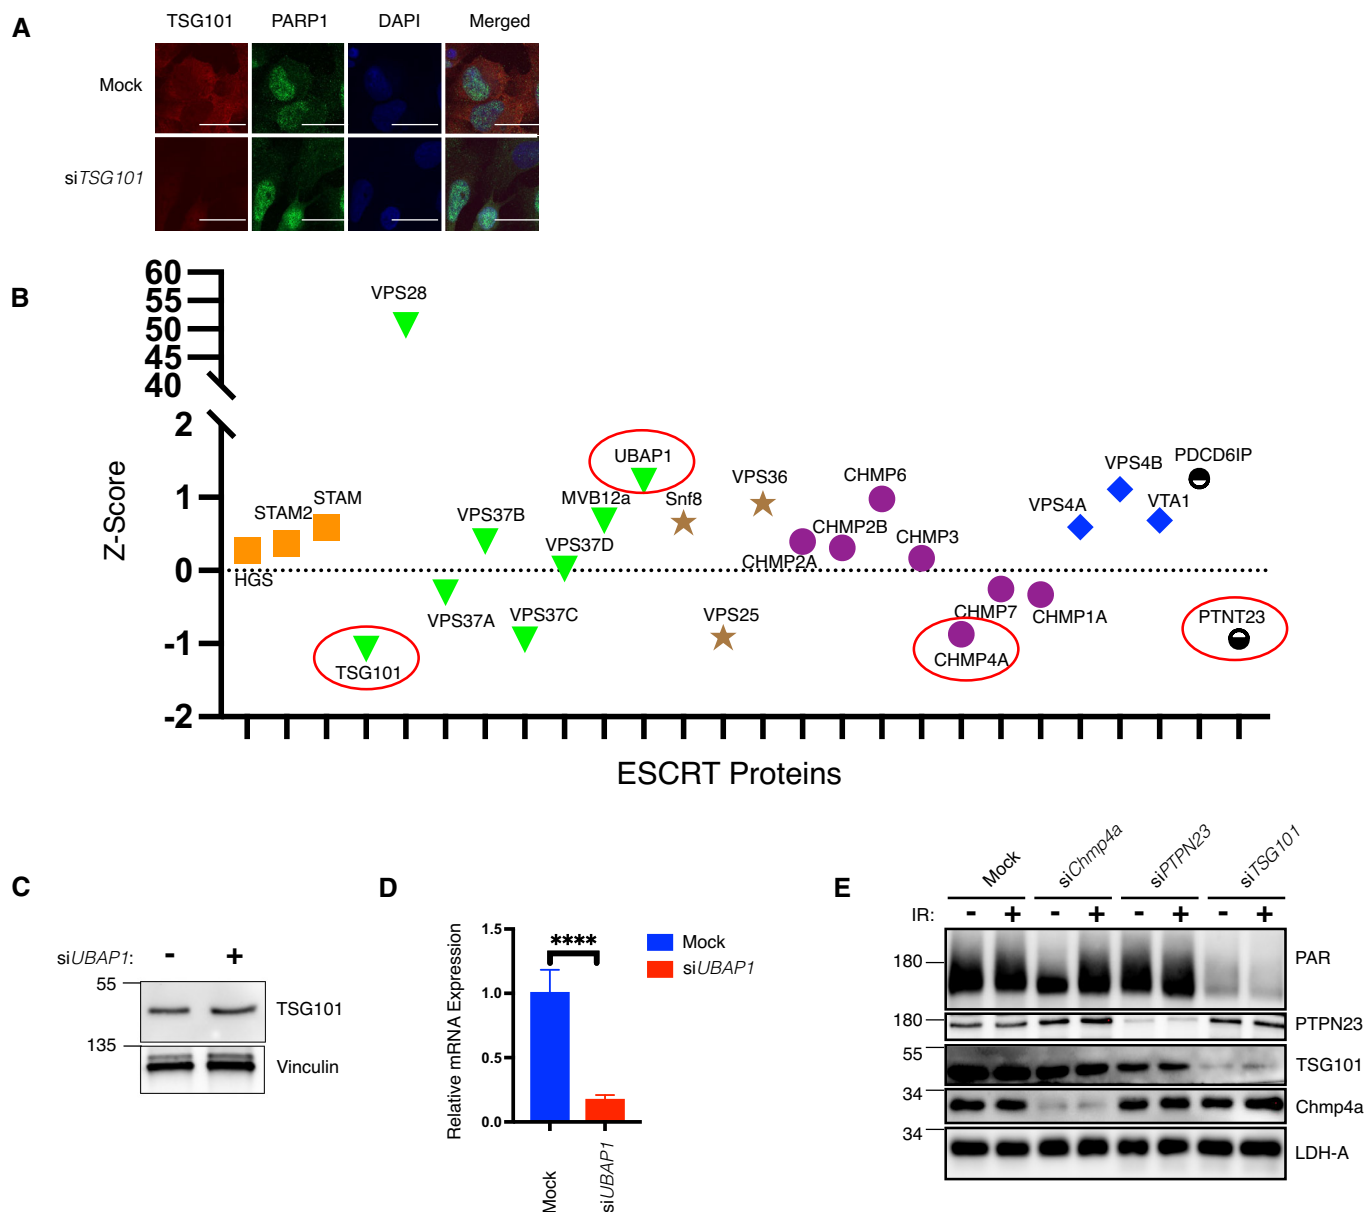

**Figure EV5. Control of PARylation by TSG101 is ESCRT complex-independent.**

- A U2-OS cells were transfected with nontargeting (mock) or *TSG101*-targeting siRNAs. Indirect immunofluorescence visualizes TSG101 (red) and PARP1 (green). DAPI staining shows the nuclei in blue. Scale bar is 10  $\mu$ m. The image is representative of three biologically independent experiments.
- B Z-scores of the mean values of the depicted ESCRT complex members and accessory proteins (ESCRT-0: orange, ESCRT-I: green, ESCRT-II: brown, ESCRT-III: purple, and ESCRT-IV: red) from Dataset EV1. Subsequently analyzed members CHMP4A, PTPN23, TSG101, and UBAP1 are highlighted with red circles.
- C U2-OS cells were transfected with nontargeting or *UBAP1*-targeting siRNAs. Whole-cell extracts were immunoblotted with antibodies against the indicated proteins. Vinculin was used as a loading control.
- D Total RNA was extracted from cells analyzed in B and converted to cDNA. The relative mRNA expression of *UBAP1* was normalized to two housekeeping genes, *RPL13A*, and *TBP2*. Data are from six biologically independent experiments. Conditions were compared with an unpaired *t*-test with Welch's correction (\*\*\*\* $P < 0.0001$ ). Error bars represent mean  $\pm$  SD.
- E U2-OS cells were transfected with nontargeting siRNAs (mock) or with siRNAs directed against *CHMP4A*, *PTPN23*, or *TSG101* and irradiated (20 Gy) or not, as indicated. PAR levels and expression of indicated proteins were monitored by western blotting with the respective agents and antibodies. LDH-A served as a loading control.

**Figure EV6. Efficient apoptosis protection and DNA repair following DNA double strand break generation requires TSG101.**

- A U2-OS cells were lentivirally transduced with two independent guide RNAs targeting the *TSG101* locus. Due to the lethal side effects of *TSG101* deletion on long-term proliferation, bulk cells were used instead of the clonally expanded cells. DNA damage was induced by irradiation (20 Gy, 3 or 9 h before analysis) in wild-type or *TSG101* CRISPR knockout bulk cells. Total mRNA was extracted and expression of *NUAK*, *PTX3*, and *PUMA* was analyzed with RT-qPCR. The mRNA expression was normalized to the housekeeping genes *ACTA1*, *RPL13A*, and *TBP2*. Data are from three biologically independent experiments. The conditions were compared with an ordinary one-way ANOVA (\*\*\* $P < 0.001$ ; \*\*\*\* $P < 0.0001$ ). Error bars represent mean  $\pm$  SEM.
- B The efficiency of *TSG101* CRISPR in the cells used in A is shown with immunoblotting. Whole-cell extracts were immunoblotted with antibodies against *TSG101*. Vinculin was used as a loading control.
- C Irradiation-induced cleaved caspase-3 activation in nontargeting gRNA or *Tsg101*-targeting gRNA transduced MEF cells was measured using a colorimetric assay. For knockout efficiencies see Fig EV6E. Bulk cells from *Tsg101* guide-1 were used in this assay. Results were obtained from four biologically independent experiments. The conditions were compared with an unpaired *t*-test (\*\*\*\* $P < 0.0001$ ). Error bars represent mean  $\pm$  SD.
- D Percentage of  $\gamma$ H2AX positive staining from Fig 6D is shown. Results were obtained from blind counting of approximately 100 cells for each condition from 3 biologically independent experiments. The conditions were compared with an unpaired *t*-test (\*\*\*\* $P < 0.0001$ ). Error bars represent mean  $\pm$  SD.
- E Wild-type MEF cells from Fig 6j (control or *Tsg101* guide RNA transduced cells) were analyzed for *Tsg101* CRISPR/Cas9 knockout efficiency. Whole-cell extracts were obtained from these cells and immunoblotted with the indicated antibodies. Vinculin was used as a loading control.
- F U2-OS cells were transfected with nontargeting (mock) or two different *TSG101*-targeting siRNAs. Nonirradiated cells (samples 1–3) were compared with senescent cells 7 days postirradiation (samples 4–6). Total mRNA was extracted and expression of *CXCL8*, *IL-6*, and *TSG101* was analyzed by RT-qPCR. The mRNA expression of these genes was normalized to the three housekeeping genes *ACTA1*, *RPL13A*, and *TBP2*. Data are from three biologically independent experiments. Conditions were compared with an ordinary one-way ANOVA (ns,  $P > 0.05$ ; \* $P < 0.05$ ; \*\* $P < 0.01$ , \*\*\* $P < 0.001$ ). The conditions were compared with an unpaired *t*-test (\*\*\*\* $P < 0.0001$ ). Error bars represent mean  $\pm$  SEM.
- G Representative brightfield images of *TSG101*-targeting or nontargeting siRNA-transfected *BRCA1* wild-type and mutant MDA-MB 231 and 436 breast cancer cells are shown.

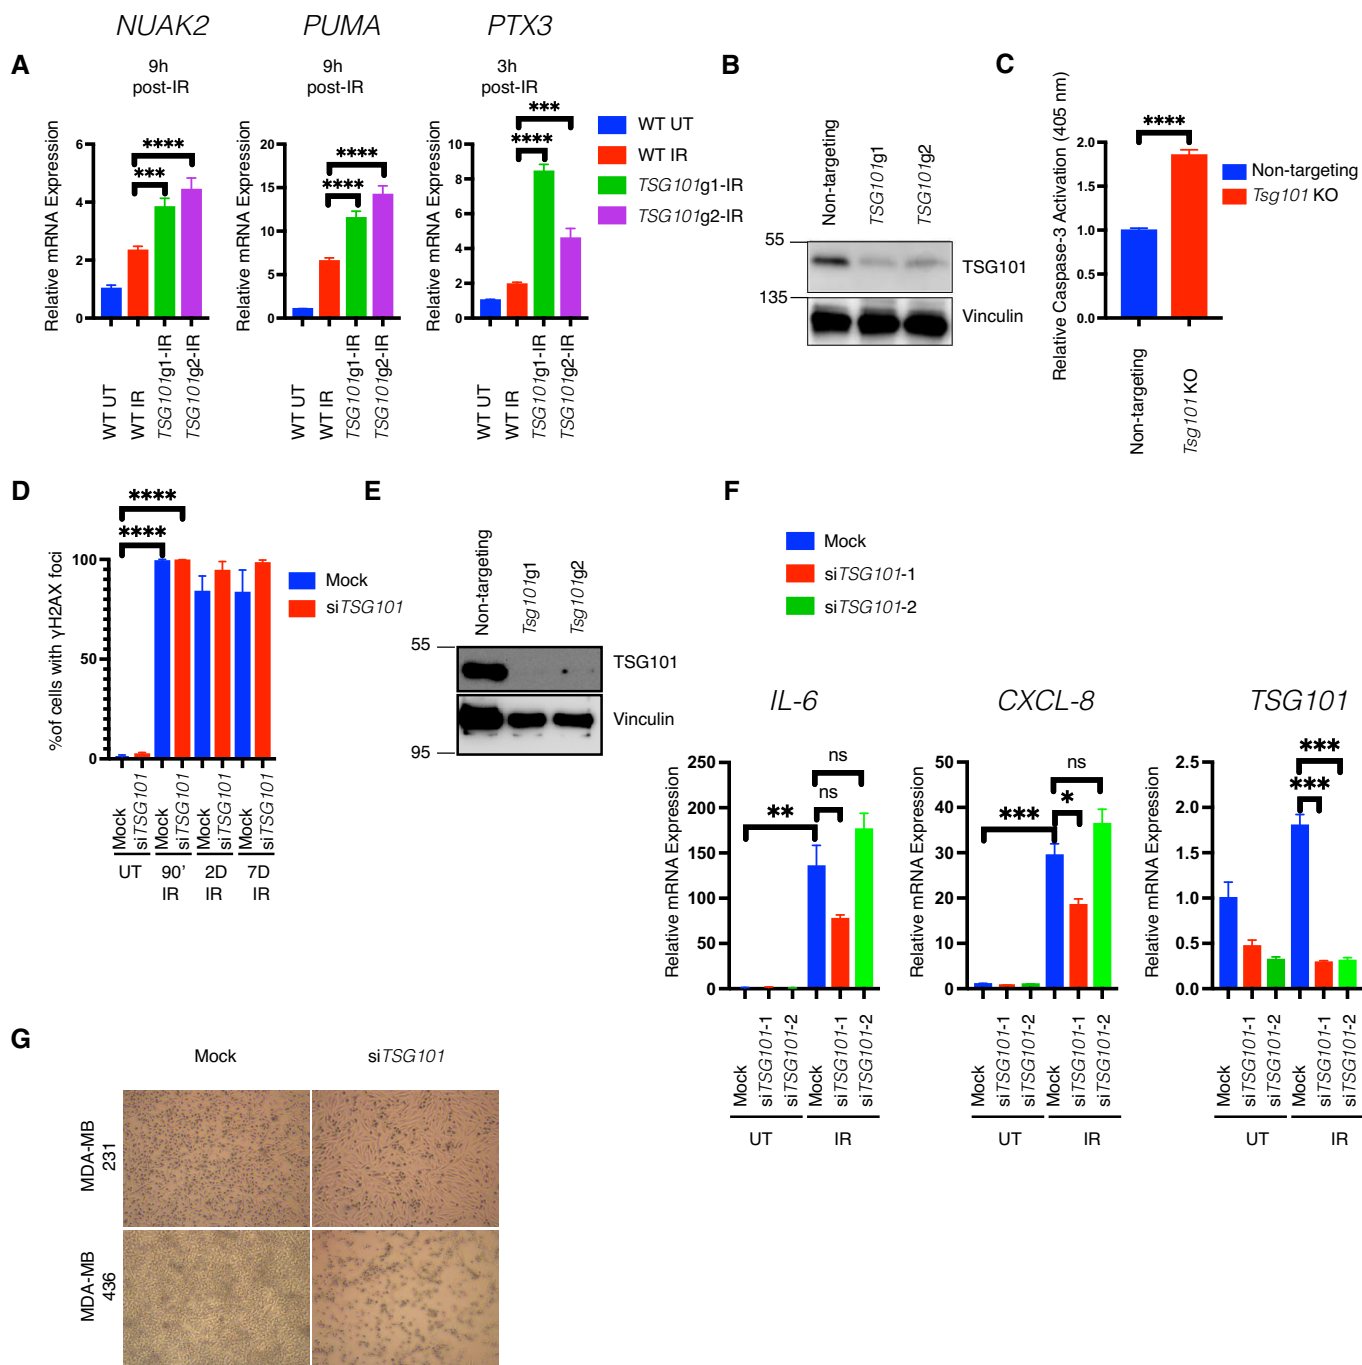

Figure EV6.
